# Supplementary material
Source: Springer Nature journal article supplement (https://www.springermedizin.de/resource/supplementary/12911_2011_533_MOESM10_ESM.pdf/9526026)
Supplement: MOESM10 [file 9526026]

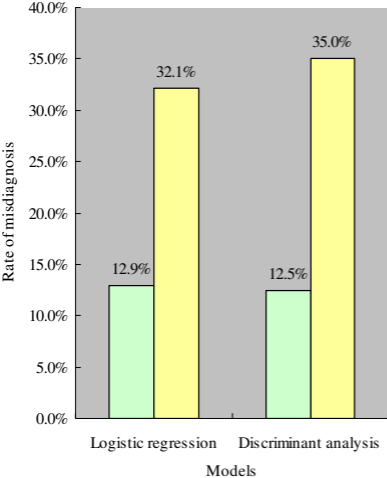

Legend:

- Light green square: Predicted probability: <math><0.26</math> and >math>0.59</math>
- Yellow square: Predicted probability: <math>0.26\sim 0.59</math>
